1 **Genomic signals of admixture and reinforcement between two closely related species of**  
2 **European sepsid flies**

3 Athene Giesen<sup>1</sup>, Wolf U. Blanckenhorn<sup>1</sup>, Martin A. Schäfer<sup>1</sup>, Kentaro K. Shimizu<sup>1</sup>, Rie  
4 Shimizu-Inatsugi<sup>1</sup>, Bernhard Misof<sup>2</sup>, Oliver Niehuis<sup>3</sup>, Lars Podsiadlowski<sup>2</sup>, Heidi E. L.  
5 Lischer<sup>1,4</sup>, Simon Aeschbacher<sup>1</sup>, Martin Kapun<sup>1,5</sup>

6

7 <sup>1</sup>Department of Evolutionary Biology and Environmental Studies, University of Zürich,  
8 Switzerland

9 <sup>2</sup>Zoological Research Museum Alexander Koenig, Bonn, Germany

10 <sup>3</sup>Department of Evolutionary Biology and Ecology, Institute of Biology I (Zoology), Albert  
11 Ludwig University, Freiburg, Germany

12 <sup>4</sup>Interfaculty Bioinformatics Unit, University of Bern, Switzerland

13 <sup>5</sup>Division of Cell & Developmental Biology, Medical University of Vienna, Austria

14

15 ***Corresponding author:*** Martin Kapun; Winterthurerstrasse 190, CH-8057 Zürich,  
16 Switzerland; Tel.: +41 44 635 47 55; martin.kapun@ieu.uzh.ch

17 **ABSTRACT**

18 Interspecific gene flow by hybridization may weaken species barriers and adaptive  
19 divergence, but can also initiate reinforcement of reproductive isolation through natural and  
20 sexual selection. The extent of interspecific gene flow and its consequences for the initiation  
21 and maintenance of species barriers in natural systems remain poorly understood, however.  
22 To assess genome-wide patterns of gene flow between the two closely related European dung  
23 fly species *Sepsis cynipsea* and *Sepsis neocynipsea* (Diptera: Sepsidae), we tested for  
24 historical gene flow with the aid of ABBA-BABA test using whole-genome resequencing  
25 data from pooled DNA of male specimens originating from natural and laboratory  
26 populations. We contrasted genome-wide variation in DNA sequence differences between  
27 samples from sympatric populations of the two species in France and Switzerland with that of  
28 interspecific differences between pairs of samples involving allopatric populations from  
29 Estonia and Italy. In the French Cevennes, we detected a relative excess of DNA sequence  
30 identity, suggesting interspecific gene flow in sympatry. In contrast, at two sites in  
31 Switzerland, we observed a relative depletion of DNA sequence identity compatible with  
32 reinforcement of species boundaries in sympatry. Our results suggest that the species  
33 boundaries between *S. cynipsea* and *S. neocynipsea* in Europe depend on the eco-geographic  
34 context.

35 **KEYWORDS:** ABBA-BABA test, gene flow, hybridization, introgression, reproductive  
36 isolation, speciation, sepsid flies

37 **Running title:** Patterns of Gene flow in European Sepsid flies

## 38 INTRODUCTION

39 According to the biological species concept, species represent groups of individuals that  
40 are reproductively isolated from other groups of individuals (Mayr 1942). Speciation entails  
41 the evolution of reproductive isolation among lineages derived from a common ancestral  
42 population and is considered completed if the diverged populations remain reproductively  
43 isolated, for example, after coming into secondary contact (Coyne & Orr, 2004; Dobzhansky,  
44 1951; Mayr, 1963). However, many animal and plant species remain distinct entities in nature  
45 even if they occasionally hybridize and exchange genes in parapatry or sympatry (Anderson,  
46 1949; Barton & Bengtsson, 1986; cf. DeMarais *et al.*, 1992; Gante *et al.*, 2016; Mallet, 2007;  
47 Nolte & Tautz, 2010; Rieseberg *et al.*, 2003; Trier *et al.*, 2014). Research during the past  
48 decades has indicated that hybridization not only has deleterious effects due to hybrid  
49 inferiority and negative epistasis in admixed genomes, but that it may also fuel adaptive  
50 diversification and speciation by facilitating novel combinations of alleles that become targets  
51 of divergent selection (Arnold & Meyer, 2006; Berner & Salzburger, 2015; Fontaine *et al.*  
52 2015; Seehausen, 2004; Saetre, 2013). Together, these findings corroborate the view that  
53 genomes of recently diverged species may represent mosaics, consisting of genomic regions  
54 with significant differentiation (i.e., low to no admixture) interspersed by genomic regions  
55 that are more free to be exchanged (Nosil *et al.*, 2009; Wu, 2001).

56 Sepsid flies (Diptera: Sepsidae) have become a model group for the study of sexual  
57 selection and ecological adaptation (Baur *et al.*, 2020; Blanckenhorn, 1999; Blanckenhorn *et*  
58 *al.*, 2000; Eberhard, 1999; Kraushaar & Blanckenhorn, 2002; Parker, 1972a,b; Puniamoorthy  
59 *et al.*, 2009; Pont & Meier, 2002; Rohner *et al.*, 2015; Rohner, Blanckenhorn, &  
60 Puniamoorthy, 2016; Ward, 1983; Ward, Hemmi, & Rösli, 1992). The phylogeny of sepsid  
61 flies is well resolved (Su *et al.*, 2008, 2016) and entails multiple pairs of closely related

62 species that occupy similar ecological niches. These species pairs provide excellent  
63 opportunities to study the genomic consequences of hybridization and introgression during  
64 early stages of speciation. One of these pairs comprises *Sepsis cynipsea* and *Sepsis*  
65 *neocynipsea*, sister species with a wide geographic distribution that occur in sympatry across  
66 major parts of their natural range. While *S. cynipsea* is the most abundant sepsid species in  
67 Central and Northern Europe and deposits its eggs into fresh cow dung, *S. neocynipsea* is  
68 common throughout North America, where it occupies a niche similar to that of *S. cynipsea* in  
69 Europe. While overall very rare in Europe, *S. neocynipsea* can be locally common at higher  
70 altitudes, such as the Alps, where the species occurs in sympatry with *S. cynipsea* (Ozerov,  
71 2005; Pont & Meier, 2002; Rohner, Blanckenhorn, & Puniamoorthy, 2016). Despite strong  
72 similarities in morphology and behavior (Giesen, Blanckenhorn, & Schäfer, 2017), the two  
73 species are genetically distinct. Previous studies showed that *S. cynipsea* and *S. neocynipsea*  
74 produce fertile hybrid offspring under laboratory conditions despite strong pre- and post-  
75 mating isolating barriers. These barriers are mediated by assortative mating behaviors that are  
76 partly reinforced in areas where the two species occur in sympatry (Giesen *et al.*, 2017, 2019).  
77 While these findings imply that interspecific gene flow may occur and vary with eco-  
78 geographic context in nature, we know little about actual levels of historical and ongoing gene  
79 flow between the two species in areas where they occur in sympatry or parapatry. We  
80 therefore investigated the extent of gene flow between *S. cynipsea* and *S. neocynipsea* in  
81 nature by comparative population genomic analyses.

82 In recent years, multiple approaches have been employed to explore the importance of  
83 interspecific gene flow in sympatry vs. allopatry (e.g. Nakazato, Warren, & Moyle, 2010;  
84 Nadeau *et al.*, 2013; Brandvain *et al.*, 2014; Bouchemousse *et al.*, 2016; Feulner &  
85 Seehausen, 2019; Kastally, Trasoletti, & Mardulyn, 2019; Moran *et al.*, 2019). The objective  
86 of our study is to assess the extent of genome-wide admixture between *S. cynipsea* and *S.*

87 *neocynipsea* in Europe by applying a version of the ABBA-BABA test for historical gene  
88 flow (Green *et al.*, 2010; Durand *et al.*, 2011; Soraggi *et al.*, 2018) that can exploit genome-  
89 wide allele frequency data of single nucleotide polymorphisms (SNPs). To this end, we  
90 sequenced the pooled genomic DNA of males from wild-caught populations of *S. cynipsea*  
91 and *S. neocynipsea* collected at multiple sites ranging from Southern France to Estonia. Some  
92 of these populations occur in sympatry (e.g., in the Swiss Alps and the French Cevennes),  
93 others in allopatry (Pont & Meier, 2002). Based on hybridization opportunity alone, we  
94 expected to find higher genome-wide levels of gene flow between *S. cynipsea* and *S.*  
95 *neocynipsea* in geographic areas where both species occur in sympatry (e.g. Nadeau *et al.*,  
96 2013, or Martin *et al.*, 2014, for *Heliconius* butterflies). In contrast, less gene flow in  
97 sympatry than in allopatry would indicate selection against gene flow and thus suggest  
98 reinforcement of reproductive barriers at sites of co-occurrence (Butlin, 1995; Noor, 1999;  
99 Coyne & Orr, 2004; e.g. Kulathinal & Singh, 2000; Massie & Makow, 2005; Giesen *et al.*  
100 2017, 2019).

## 101 **MATERIALS & METHODS**

### 102 **Sample collection and treatment of fly cultures**

103 We studied inter- and intraspecific gene flow in *S. cynipsea* and *S. neocynipsea* using  
104 genomic data of sympatric *S. cynipsea* and *S. neocynipsea* populations from two high altitude  
105 sampling sites in the Swiss Alps (Sörenberg) and the French Cevennes (Le Mourier) (Table  
106 1). To complement these two pairs of sympatric populations with geographically distant  
107 allopatric populations in Europe (Table 1), we further included *S. cynipsea* samples from the  
108 Swiss lowlands (Zürich), from Tuscany, Italy (Petroia) and Estonia (Pehka), and from two  
109 additional high-altitude *S. neocynipsea* samples collected in Switzerland (Geschinen and  
110 Hospental) (Table 1). In line with the previous observation that *S. neocynipsea* tends to be

111 rare at low altitudes (Pont & Meier, 2002), we were not able to collect sufficient numbers of  
112 flies of this species outside the Alps, except for the sample collected near Le Mourier. For  
113 each of the wild-caught populations, we randomly selected 20 males for pooled DNA  
114 resequencing (Pool-Seq).

115 In addition to wild-caught populations, we compiled genomic data from two laboratory  
116 populations that were established from sympatric *S. cynipsea* and *S. neocynipsea* populations  
117 collected near Zürich. We started each of these populations from a single gravid, wild-caught  
118 female and subsequently propagated them in the laboratory for at least two years at census  
119 population sizes ranging from 10 to 100. We then sampled and pooled the DNA of 50 males  
120 from each population for whole-genome sequencing (see Supporting Information for more  
121 details).

## 122 **DNA library preparation and next generation sequencing**

123 Genomic DNA was extracted from the pooled DNA of males using the UltraPure  
124 Phenol:Chloroform:Isoamyl alcohol (25:24:1, v/v) extraction kit (Thermo Fischer Scientific,  
125 Waltham, USA) according to the manufacturer's protocol. Quantification of genomic DNA  
126 was performed with a Qubit Fluorometer (Thermo Fischer Scientific; Table 1). Library  
127 preparation was carried out with the TruSeq DNA PCR-Free Library Preparation (Illumina,  
128 San Diego, USA) kit according to the manufacturer's protocol. Fragment-size distributions of  
129 all libraries were validated on a TapeStation 2200 (Agilent Technologies, Waldbronn,  
130 Germany). Sequencing on Illumina HiSeq 2500 version 4 was conducted after labeling and  
131 pooling the barcoded DNA representing the four laboratory populations onto one lane to  
132 achieve a genome-wide coverage of ca. 60x per DNA pool library. All sequencing data are  
133 available at the short-read archive (SRA; <https://www.ncbi.nlm.nih.gov/sra>) under the  
134 accession number PRJNA612154.

135 **Table 1:** Sampling sites, sample IDs, percentages of DNA sequence reads mapping to the  
 136 reference genome and read-depths of pool-sequenced field-collected (a) and laboratory (b)  
 137 populations. Sites where *S. cynipsea* and *S. neocynipsea* occur in sympatry are in regular font.  
 138 Sites where *S. neocynipsea* does not occur to our knowledge are highlighted in italics.  
 139

| Species                  | ID   | Location       | Country        | Coordinates                  | Altitude<br>(m) | Alignment                                                 | Average<br>Read-<br>depth |
|--------------------------|------|----------------|----------------|------------------------------|-----------------|-----------------------------------------------------------|---------------------------|
|                          |      |                |                |                              |                 | rate to <i>S.</i><br><i>thoracica</i><br>reference<br>[%] |                           |
| <b>a) Wild-caught</b>    |      |                |                |                              |                 |                                                           |                           |
| <i>S. cynipsea</i>       | PhC  | <i>Pehka</i>   | <i>Estonia</i> | 59°28'45.1''N, 25°44'52.3''E | 5               | 50.6%                                                     | 19.8                      |
|                          | PtC  | <i>Petroia</i> | <i>Italy</i>   | 43°15'06.4''N, 12°32'41.2''E | 570             | 48.1%                                                     | 29.2                      |
|                          | SoC  | Sörenberg      | Switzerland    | 46°52'12''N, 8°16'12''E      | 1200            | 51.3%                                                     | 35.1                      |
|                          | ZuC  | Zürich         | Switzerland    | 47°24'0.6''N, 8°34'24.0''E   | 450             | 51.3%                                                     | 37.3                      |
|                          | MoC  | Le Mourier     | France         | 44° 3'30.5"N, 3°25'38.8"E    | 900             | 49.5%                                                     | 62.5                      |
| <i>S. neocynipsea</i>    | GeN  | Geschinen      | Switzerland    | 46°49'23.7''N, 8°1'54.6''E   | 1350            | 50.5%                                                     | 32.1                      |
|                          | HoN  | Hospenthal     | Switzerland    | 46° 37'12''N, 8°34'12''E     | 1500            | 52.3%                                                     | 25.4                      |
|                          | SoN  | Sörenberg      | Switzerland    | 46°24'8.2''N, 8°21'28.4''E   | 1200            | 50.7%                                                     | 23.0                      |
|                          | MoN  | Le Mourier     | France         | 44° 3'30.5"N, 3°25'38.8"E    | 900             | 48.6%                                                     | 74.2                      |
| <b>b) Laboratory</b>     |      |                |                |                              |                 |                                                           |                           |
| <i>S. cynipsea</i>       | IZuC | Zürich         | Switzerland    | 47°24'0.6''N, 8°34'24.0''E   | 402             | 50.1%                                                     | 19.2                      |
| <i>S. neocynipsea</i>    | IZuN | Zürich         | Switzerland    | 47°24'0.6''N, 8°34'24.0''E   | 402             | 50.0%                                                     | 67.2                      |
| <i>c) S. orthocnemis</i> |      | Lenzerheide    | Switzerland    | 46°43'45''N, 9°33'25''E      | 1470            | 46.9%                                                     | 13.0                      |

140

## 141 Raw read processing

142 Qualitative validation of sequence data before and after trimming was done with FastQC  
 143 (v. 0.11.4; Andrews *et al.*, 2011). After removal of Illumina-specific adapters and trimming  
 144 with *Trimmomatic* (v. 0.36; Bolger, Lohse & Usadel, 2014), the *S. cynipsea* and *S.*  
 145 *neocynipsea* reads were mapped to the draft genome of *S. thoracica* with *bwa mem* (v. 0.7.12;

146 Li & Durbin, 2009) using default parameters. The *S. thoracica* sample used for genome  
147 sequencing was collected near Capriasca, Ticino, Switzerland. The draft genome, v. 0.1 was  
148 built from Oxford Nanopore long reads (app. 25x read depth), assembled with Canu (Korner  
149 *et al.*, 2017), and polished with Illumina short reads (app. 20x read depth). The assembly used  
150 in this study is available under the rules of the Fort Lauderdale agreement from  
151 [www.cgae.de/seto\\_01\\_genome.fasta](http://www.cgae.de/seto_01_genome.fasta) and [www.cgae.de/seto\\_01\\_genome\\_masked.fasta](http://www.cgae.de/seto_01_genome_masked.fasta).

152 PCR duplicates were removed with Picard (v. 1.109; <http://broadinstitute.github.io/picard/>)  
153 and reads were realigned around indels in each raw alignment file using  
154 RealignerTargetCreator and IndelRealigner from GATK (v. 3.4-46; McKenna *et al.* 2010).  
155 Only reads with a PHRED-scaled mapping quality of 20 and more were retained. We applied  
156 the same procedure to map reads of a pool of ten inbred *S. orthocnemis* males from near  
157 Lenzerheide, Switzerland, to the reference genome (Table 1). We compiled the aligned reads  
158 from all population samples into a single *mpileup* file using *samtools* (v. 1.3.1; Li *et al.*,  
159 2009).

160 Using the variant-caller Pool-SNP (Kapun *et al.*, 2018), we identified high-confidence  
161 SNPs with the following combination of heuristic SNP-calling parameters: coverage of each  
162 Pool-Seq sample  $\geq 10x$ ; coverage of each Pool-Seq sample  $\leq 95$  % percentile of coverage  
163 distribution across contigs and samples; minimum allele count of a minor allele at a SNP  
164 across all combined Pool-Seq samples  $> 20x$ ; minor allele frequency at a SNP across all  
165 combined Pool-Seq samples  $> 0.01$ . We only retained SNPs for which all samples fulfilled  
166 the above coverage threshold criteria. To avoid paralogous SNPs due to mis-mapping around  
167 indel polymorphisms, we removed SNPs located within a 5-bp distance to indels that  
168 occurred in more than 20 copies at a given site across all pooled samples. In addition, we  
169 ignored SNPs located within repetitive regions. The resulting VCF file was converted to the



170 SYNC file format (Kofler *et al.*, 2011), and a custom Python script was used to calculate

171 sample-specific allele frequencies for major alleles at each SNP (*sync2AF.py*;

172 [https://github.com/capoony/DrosEU\\_pipeline](https://github.com/capoony/DrosEU_pipeline)).

173

## 174 **Testing for introgression**

175 To test for introgression, we used the ABBA-BABA test for historical gene flow in the  
176 presence of incomplete lineage sorting (Green *et al.*, 2010; Durand *et al.*, 2011). We provide a  
177 brief motivation of the approach in the following and refer to the Supporting Information for  
178 further details. Imagine a rooted phylogeny with four species (P1 to P4) and a topology of  
179 (((P1, P2), P3), P4) as illustrated in Fig. 1B. In an alignment of one haploid genome from  
180 each species, incomplete lineage sorting under neutral evolution leads to two mutational  
181 configurations of the ancestral (A) and derived (B) allele, ABBA and BABA, that are  
182 incompatible with the species topology (Fig. 1B) under the infinite-sites model of mutation  
183 (Kimura, 1969). In the absence of gene flow between P2 and P3, ABBA and BABA  
184 configurations occur with equal probability (Hudson, 1983; Tajima, 1983). In contrast,  
185 historical gene flow between P2 and P3 causes an excess of ABBA configurations (Green *et*  
186 *al.*, 2010; Durand *et al.*, 2011). This logic is captured by the *D*-statistic, a scaled difference  
187 across a set of bases between counts of ABBA and BABA configurations bounded by  $-1$  and  
188  $1$  (Green *et al.*, 2010). The ABBA-BABA test examines significant deviations of *D* from 0. A  
189 significant excess of ABBA suggests evidence for gene flow between P2 and P3. A  
190 significant depletion of ABBA is equivalent to an excess of ABBA if the positions of P1 and  
191 P2 in the species topology are swapped, and hence either suggests gene flow between P1 and  
192 P3, or a reduction in gene flow between P2 and P3 relative to gene flow between P1 and P3.

193 The original version of the ABBA-BABA test and modifications of it have been applied to  
194 different types of genome-scale polymorphism data obtained with various sequencing  
195 strategies, including whole genome sequencing (e.g. Green *et al.*, 2010), RAD sequencing  
196 (e.g., Eaton & Ree, 2013; Meier *et al.*, 2017; Streicher *et al.*, 2014), and exon capture data  
197 (e.g., Heliconius Genome Consortium, 2012). More recently, Durand *et al.* (2011) and

198 Soraggi *et al.* (2018) extended the original test to allele frequency data, hence to unphased  
199 sequencing data (including Pool-Seq data; Schlötterer *et al.* 2014). We implemented the  
200 extensions by Durand *et al.* (2011) and Soraggi *et al.* (2018) in a Python script  
201 (<https://github.com/capoon/ABBABABA-4AF>) and refer to the respective test statistics as  
202  $D_D$  and  $D_S$ . Our script also computes jack-knifed  $z$ -scores based on a matrix of allele  
203 frequencies for previously defined high-confidence SNPs (see Supporting Information for  
204 details). We adopted the commonly used significance threshold of  $|z| > 3$  (Reich *et al.*, 2011;  
205 Jeong *et al.*, 2016; Novikova *et al.*, 2016) to identify significant deviations of  $D_S$  and  $D_D$  from  
206 zero.

207 We were concerned that using the same genome assembly both as the reference for read  
208 mapping and as the outgroup (P4) in the ABBA-BABA tests could lead to biased estimates of  
209 gene flow. We therefore mapped the three ingroup and the outgroup species against the  
210 reference genome of yet another species, *S. thoracica*. A phylogenetic analysis based on CO-  
211 II sequences by Su *et al.* (2008) indicated that *S. thoracica* is approximately equally related to  
212 *S. cynipsea* and *S. neocynipsea* as it is from the outgroup species *S. orthocnemis* (Fig. 1A).  
213 We therefore expected that reads of the ingroup and the outgroup species would map equally  
214 well to the reference species, which is indeed what we observed (Table 1).

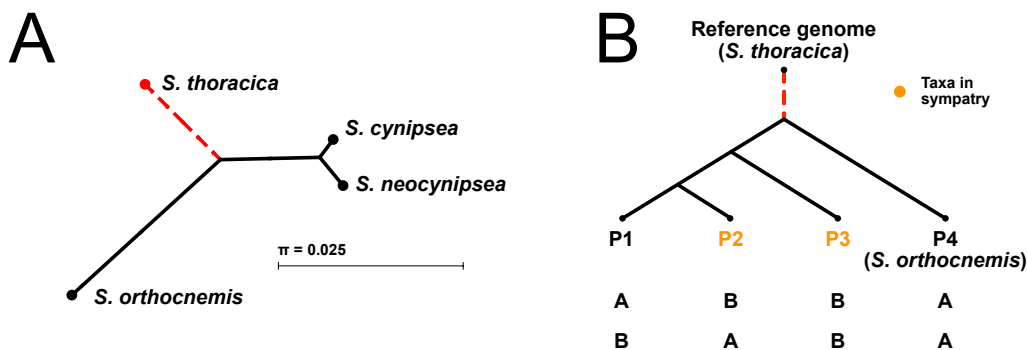

215

216 **Fig. 1. Putative phylogeny of sepsid species studied.** (A) Species phylogeny inferred from  
217 alignments of nucleotide sequences at the cytochrome oxidase subunit II (CO-II)  
218 mitochondrial locus (Genbank sequences from Su *et al.*, 2016) with the Neighbor-Joining  
219 method implemented in CLC Main Workbench (v. 8.1.2; [https://](https://www.qiagenbioinformatics.com/products/clc-main-workbench/)  
220 <https://www.qiagenbioinformatics.com/products/clc-main-workbench/>). The tree topology is  
221 consistent with the phylogeny presented by Su *et al.*'s (2016) combined phylogenetic analysis  
222 of multiple nuclear and mitochondrial markers. *Sepsis orthocnemis* was used as the outgroup  
223 for the focal species *S. cynipsea* and *S. neocynipsea*. Whole-genome sequencing reads from  
224 all three species were aligned to the *S. thoracica* reference genome (dashed red branches).  
225 Branch lengths are proportional to the mean number of pairwise sequence differences. (B)  
226 Generic species tree assumed in all our ABBA-BABA tests for gene flow among triplets of *S.*  
227 *cynipsea* and *S. neocynipsea* populations from various sites in Europe.

228

229 We focused our analysis of historical interspecific gene flow on the three sampling sites  
230 Sörenberg, Zürich and Le Mourier (Table 1). At all these sites, *S. cynipsea* and *S. neocynipsea*  
231 occur in sympatry. In all ABBA-BABA tests, we positioned the two focal populations as P2  
232 and P3 ingroups in the phylogeny (in both possible orders) and used various P1 ingroup  
233 populations (Fig. 1B) assumed to occur in allopatry with the P2 populations. We used various  
234 P1 ingroups, because Durand *et al.* (2011) showed that the choice of the ingroup P1 can  
235 influence the test results.

## 236 RESULTS

### 237 Signals of reinforcement in Swiss alpine and sub-alpine regions

238 The majority of our tests for gene flow at the Sörenberg site revealed a genome-wide  
239 deficiency of derived-allele sharing (i.e., ABBA patterns) among the local *S. cynipsea* and *S.*  
240 *neocynipsea* populations (Table 2), suggesting that interspecific gene flow in sympatry  
241 (among P2 and P3) is lower than interspecific gene flow among putatively allopatric  
242 populations (P1 and P3). This observation is robust to our choice of the P1 ingroup  
243 population, but sensitive to the version of *D*-statistic used ( $D_S$  vs.  $D_D$ ). We first conducted  
244 tests involving two *S. neocynipsea* populations from the Swiss Alps (*S. neocynipsea* from  
245 Geschinen, GeN; *S. neocynipsea* from Hospental, HoN; Table 1) as putatively allopatric P1,

246 and the sympatric interspecific pair from Sörenberg as P2 (*S. neocynipsea*) and P3 (*S.*  
247 *cynipsea*). We observed a significant deficiency of ABBA patterns in all configurations ( $D_s >$   
248 0; Table 2, upper part), suggesting overall evidence for higher gene flow among putatively  
249 allopatric than sympatric interspecific population pairs. While GeN and HoN are both  
250 separated by high mountains (altitudes ranging from ca. 600–3,200 m asl) from the Sörenberg  
251 site, they are geographically close (ca. 67.5 km and ca. 46.7 km Euclidean distance for GeN  
252 and HoN, respectively) and they occur in sympatry with other sepsid species, including *S.*  
253 *cynipsea*. We were therefore concerned that our assumption of no gene flow between P1 and  
254 P3 was violated, because GeN and HoN are parapatric rather than allopatric to our focal  
255 populations in Sörenberg.

256 To address this concern, we conducted additional ABBA-BABA tests involving P1  
257 populations from geographically more remote sites in Europe. Specifically, we performed a  
258 second series of tests with two alternative *S. cynipsea* populations as allopatric P1 ingroups  
259 (Fig. 1B), one from Pehka, Estonia (PhC), and one from Petroia, Italy (PtC; Table 1).  
260 Contrary to our expectation based on the much larger geographical distance between P1 and  
261 P3 (ca. 1,850 km and ca. 550 km for PhC and PtC, respectively) than between P2 and P3 in  
262 these configurations, we still found a significant deficiency of ABBA patterns in both tests  
263 ( $D_s > 0$ ; Table 2, lower part). In agreement with our previous tests involving GeN and HoN as  
264 P1, these additional tests thus equally suggest higher interspecific gene flow among allopatric  
265 (P1 and P3) than among sympatric populations (P2 and P3). As we are much more confident  
266 that PhC and PtC represent truly allopatric P1 ingroups relative to P2 and P3, we think that  
267 the deficiency of ABBA patterns at the Sörenberg site indicates a local reduction in  
268 interspecific gene flow in sympatry, likely due to reinforcement.

269 When repeating the ABBA-BABA tests with the  $D$ -statistic ( $D_D$ ) suggested by Durand *et*  
270 *al.* (2011), we obtained results that qualitatively agree with those obtained with the  $D_S$  statistic  
271 only when using PhC and PtC as P1 ( $D_D < 0$ ;  $z$  scores -8.4 and -7.7, respectively; Table S1  
272 lower part), but not with GeN and HoN as P1 ( $z$ -scores 1.4 and 1.9, respectively; Table S1,  
273 upper part). Besides the above qualitative differences between tests based on  $D_S$  vs.  $D_D$ , we  
274 observed that variances of  $D_D$  estimated by jackknifing were about one order of magnitude  
275 larger than the corresponding variances of  $D_S$ , which might indicate differences in the  
276 robustness of the two measures. Nonetheless, the qualitatively similar results obtained with  
277 the two versions of  $D$ -statistics makes us confident that our findings are robust. We further  
278 observed that windows of elevated  $D_S$  (Fig. 2, top) were not homogeneously distributed along  
279 the genome, but aggregated in clusters in several contigs. Such clustering might suggest that  
280 the respective genomic regions contain variation involved in reinforcement caused by  
281 divergent selection against gene flow between the two species.

282 Since both species commonly co-occur in alpine and sub-alpine regions of Switzerland, we  
283 were curious to see if a signal of reinforcement was also evident at other sites of sympatry in  
284 this geographic area. We therefore investigated a nearby lowland sampling site in Zürich  
285 where we also found *S. cynipsea* and *S. neocynipsea* in sympatry. In contrast to the  
286 sequencing data from Sörenberg, which were generated from wild-caught specimens only, the  
287 sequencing data from the Zürich site derive from a combination of samples from natural and  
288 laboratory populations. Specifically, for *S. cynipsea*, we sequenced a pool of flies sampled  
289 directly from the natural population as well as a pool of flies from a laboratory population that  
290 was derived from the same natural population (see Material and Methods for details); for *S.*  
291 *neocynipsea*, we only had a pool of flies sampled from a laboratory population derived from  
292 the natural population (Table 1). We found that the ABBA-BABA tests were qualitatively  
293 robust to whether we used *S. cynipsea* data from natural or laboratory populations. However,

294 results depended on the choice of the  $D$  statistic ( $D_S$  vs.  $D_D$ ) and of the P1 ingroup  
 295 (Supplementary Information, Supplementary Table S2). All ABBA-BABA tests based on  $D_S$   
 296 that included GeN, HoN, or PtC as P1 were significant and revealed a deficiency of ABBA  
 297 patterns, whereas tests with PhC as P1 were not significant (Supplementary Table S2). All  
 298 significant tests were therefore consistent with our tests for the Sörenberg site in that they  
 299 suggested reduced interspecific gene flow in sympatry relative to allopatry. In contrast, only  
 300 two out of eight ABBA-BABA tests based on  $D_S$  were significant, one suggesting an excess  
 301 and one a deficiency of ABBA patterns. Overall, our results for the Zurich site are compatible  
 302 with reinforcement, although the signal seems to be weaker compared to the Sörenberg site.

303 **Table 2:** Results of ABBA-BABA tests applied to samples originating from sympatric  
 304 populations of *S. cynipsea* and *S. neocynipsea* in Sörenberg as P2 and P3 (or vice versa) based  
 305 on  $D_S$ . The upper half of the table shows tests with two European *S. neocynipsea* populations  
 306 from Geschinen (GeN) and Hospental (HoN) as P1 ingroups, and the bottom half shows the  
 307 reciprocal approach with two *S. cynipsea* populations from Pehka, Estonia (PhC) and Petroia,  
 308 Italy (PtC) as P1 ingroups. The first three columns indicate the phylogeny assumed for the  
 309 test, with P4 always being *S. orthocnemis*; columns 4 to 6 give the genome-wide average  $D_S$ ,  
 310 its jackknifed standard deviation  $SD(D_S)$ , and the corresponding  $z$ -score. Significant tests are  
 311 shown in bold.  
 312

| P1         | P2         | P3         | $D_S$        | $SD(D_S)$       | $z$         |
|------------|------------|------------|--------------|-----------------|-------------|
| <b>GeN</b> | <b>SoN</b> | <b>SoC</b> | <b>0.008</b> | <b>1.35E-03</b> | <b>5.8</b>  |
| <b>HoN</b> | <b>SoN</b> | <b>SoC</b> | <b>0.006</b> | <b>1.34E-03</b> | <b>4.2</b>  |
| <b>PhC</b> | <b>SoC</b> | <b>SoN</b> | <b>0.026</b> | <b>1.92E-03</b> | <b>13.4</b> |
| <b>PtC</b> | <b>SoC</b> | <b>SoN</b> | <b>0.039</b> | <b>1.97E-03</b> | <b>19.8</b> |

313

314 **Signals of introgression in high altitude populations from Southern France**

315 Complementary to the alpine location in Sörenberg (Switzerland), we further investigated  
 316 a pair of sympatric *S. cynipsea* and *S. neocynipsea* populations at high altitude site around Le  
 317 Mourier in the Cevennes, Southern France (790 m asl), approximately 450 km southwest of  
 318 the sampling site in Switzerland. Interestingly, we found opposite patterns to those observed  
 319 at the Sörenberg site (Table 3). Specifically, all tests based on  $D_S$  showed a highly significant  
 320 excess of ABBA patterns, and hence more interspecific gene flow in sympatry than allopatry.  
 321 The corresponding tests based on  $D_D$  also indicated an excess of ABBA patterns (recall the  
 322 difference in sign between  $D_S$  and  $D_D$ ), but were not significant (Supporting Table S3). In  
 323 contrast to the patterns in Sörenberg, we did not observe genomic clustering of extreme  
 324 values of  $D_S$  (Fig. 2, bottom).

325 **Table 3:** Results of ABBA-BABA tests applied to samples originating from sympatric  
 326 populations of *S. cynipsea* and *S. neocynipsea* in the French Cevennes as P2 and P3 (or *vice*  
 327 *versa*) based on  $D_S$ . As in Tables 2 and 3, the upper half of the table summarizes tests  
 328 involving two *S. neocynipsea* populations from Geschinen (GeN) and Hospental (HoN) as P1  
 329 ingroups, and the bottom half summarizes tests involving *S. cynipsea* populations from Pehka,  
 330 Estonia (PhC) and Petroia, Italy (PtC) as P1.

331

| P1         | P2         | P3         | $D_S$         | $SD(D_S)$       | $z$          |
|------------|------------|------------|---------------|-----------------|--------------|
| <b>GeN</b> | <b>MoN</b> | <b>MoC</b> | <b>-0.014</b> | <b>1.30E-03</b> | <b>-11.0</b> |
| <b>HoN</b> | <b>MoN</b> | <b>MoC</b> | <b>-0.014</b> | <b>1.36E-03</b> | <b>-10.6</b> |
| <b>PhC</b> | <b>MoC</b> | <b>MoN</b> | <b>-0.030</b> | <b>1.84E-03</b> | <b>-16.2</b> |
| <b>PtC</b> | <b>MoC</b> | <b>MoN</b> | <b>-0.016</b> | <b>1.93E-03</b> | <b>-8.3</b>  |

332



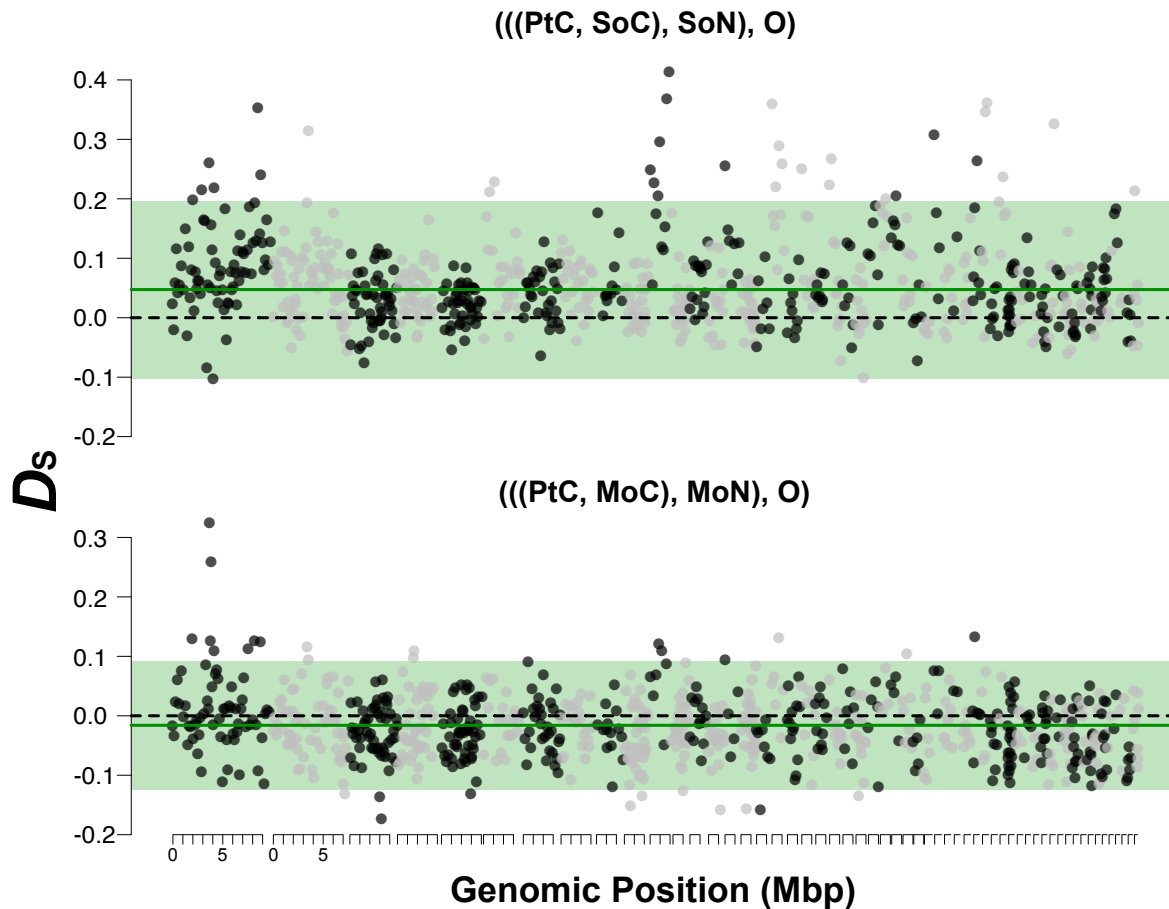

333

334 **Fig. 2. Variation of  $D_s$  along the genome.** Dots indicate  $D_s$  (Soraggi *et al.* 2018) for  
335 genomic windows of 500 consecutive SNPs, oriented by contigs of the *S. thoracica* reference  
336 genome with a length  $\geq 50,000$  bp (highlighted by alternating black and grey colors). The top  
337 and bottom panels show results for the population tree topologies used to test for interspecific  
338 gene flow at the focal sites in Sörenberg (SoC-SoN; deficiency of ABBA patterns) and Le  
339 Mourier (MoC-MoN; excess of ABBA patterns), respectively. The horizontal dashed black  
340 and green lines indicate the neutral expectation ( $D_s = 0$ ) and the mean genome-wide jackknife  
341 estimate, respectively. Green shading delimits mean  $D_s \pm 2$  standard deviations (based on  
342 windows of 500 SNPs).

## 343 DISCUSSION

344 We applied the ABBA-BABA approach (Green *et al.*, 2010; Durand *et al.*, 2011; Soraggi  
345 *et al.*, 2018) to infer historical gene flow between a pair of closely related species of sepsid  
346 flies for which we have detailed information on ecology, morphology, life history, and  
347 behavior (Blanckenhorn, 1999; Blanckenhorn *et al.*, 2000; Eberhard, 1999; Ozerov, 2005;

348 Parker, 1972a,b; Pont & Meier, 2002; Puniamoorthy *et al.*, 2009; Rohner, Blanckenhorn &  
349 Puniamoorthy, 2016; Ward, 1983; Ward, Hemmi & Rösli, 1992; Giesen *et al.*, 2017, 2019).  
350 Previous population genetic analyses of microsatellite markers (Baur *et al.*, 2020) and  
351 hybridization experiments in the laboratory (Giesen *et al.*, 2017, 2019) suggested that *S.*  
352 *cynipsea* and *S. neocynipsea* are genetically distinct, but may occasionally hybridize in nature  
353 when occurring in sympatry. Here, we tested this hypothesis by analyzing patterns of DNA  
354 sequence variation among pools of field-caught and laboratory specimens from multiple  
355 sampling sites across Europe at which either both species occur in sympatry or only one  
356 species (*S. cynipsea*) occurs. As discussed in detail below, depending on the focal site of  
357 sympatry, we found two qualitatively opposite patterns of interspecific gene flow in sympatry  
358 versus allopatry: a relative reduction of gene flow in sympatry at two sampling sites in  
359 Switzerland, and a relative excess of gene flow in sympatry at a sampling site in Southern  
360 France. Previous studies comparing levels of interspecific gene flow in sympatry and  
361 allopatry in other taxa found the full spectrum of results that we here obtained for one species  
362 pair. Martin *et al.* (2014; see also Nadeau *et al.*, 2013) and Brandvain *et al.* (2014; see also  
363 Grossenbacher & Whittall, 2011) found evidence for higher levels of interspecific gene flow  
364 in sympatry than in allopatry when studying *Heliconius* butterflies and monkey flowers  
365 (*Mimulus guttatus/nasutus*), respectively. In contrast, less gene flow in sympatry than  
366 allopatry was observed in studies on *Drosophila arizonae/mojavensis* (Massie & Makow,  
367 2005) and on two species of sea squirt (Tunicata: Bouchemousse *et al.*, 2016), while no  
368 geographic variation in levels of gene flow between sympatric and allopatric populations was  
369 found in studies on wild tomatoes (Nakazato *et al.*, 2010). A reduction in average gene flow  
370 in sympatry compared to allopatry may suggest reinforcement by natural or sexual selection  
371 (Butlin, 1995; Noor, 1999; Coyne & Orr, 2004; cf. Giesen *et al.*, 2017, 2019). However, we  
372 caution that comparing average levels of gene flow between sympatric and allopatric

373 population pairs may fall short of detecting selection against interspecific gene flow. In  
374 monkey flowers, there is evidence for divergent selection against gene flow in sympatry (in  
375 terms of a negative correlation between nucleotide divergence and recombination rate) even  
376 though average levels of introgression are higher in sympatry than allopatry (Brandvain *et al.*  
377 2014; Aeschbacher *et al.* 2017).

378        Similar to research on *Heliconius* (Martin *et al.*, 2014), we found evidence for an excess of  
379 average levels of interspecific gene flow in sympatry compared to allopatry in flies from Le  
380 Mourier based on pool-sequenced field-caught specimens (Table 3; Table S3). In contrast, at  
381 two Swiss sites where the two species also occur in sympatry, we observed reduced average  
382 levels of interspecific gene flow relative to interspecific pairs of parapatric and allopatric  
383 populations, similar to patterns found in *Drosophila arizonae/mojavensis* (Massie & Makow,  
384 2005) and sea squirts (Bouchemousse *et al.*, 2016). Consistent with our previous study  
385 showing behavioral reinforcement after enforced hybridization in the laboratory (Giesen *et*  
386 *al.*, 2017), the genomic data analyzed here suggest that selection against interspecific gene  
387 flow (Noor, 1999) might also occur in nature in the two sympatric Swiss populations. The  
388 reduction of interspecific gene flow was more pronounced at the Sörenberg site in the Swiss  
389 Alps (Table 2; Table S1) than at the lowland site in Zürich (Tables 3; Table S2), but  
390 qualitatively consistent. However, as evidenced by our contrasting findings for the site in Le  
391 Mourier, reinforcement may not be a necessary outcome whenever *S. cynipsea* and *S.*  
392 *neocynipsea* occur in sympatry. The extent of gene flow between these two dung fly sister  
393 species thus appears to covary with local environmental conditions. Well-documented  
394 differences in climate between Southern France and the Swiss Alps, and between the Swiss  
395 Alps and the Swiss lowlands, might provide an ecological explanation for the qualitative and  
396 quantitative differences in interspecific gene flow we observed at the different locations  
397 (Doebeli & Dieckmann, 2003; Rohner *et al.*, 2015). While average minimum temperatures are

398 similar in the French Cevennes and the Swiss Alps, average maximum temperatures are up to  
399 5 °C higher at the French site compared to Sörenberg (Figure 3). In addition, both sampling  
400 sites are characterized by very different precipitation regimes. During the main growing  
401 season from May until October, Sörenberg (a peat bog site) has on average twice as much  
402 rainfall than the location in Le Mourier. However, the mechanisms by which climate affects  
403 behavior and/or fitness remain to be understood (Giesen *et al.*, 2017, 2019).

404 We found a weaker signal of reinforcement between *S. cynipsea* and *S. neocynipsea* at the  
405 lowland Zürich site than at the high altitude Sörenberg site in the Swiss Alps. Differences in  
406 the strength of reinforcement may also result from climatic variation between these two sites  
407 in Switzerland to ultimately influence the strength of selection on natural hybrids. While  
408 precipitation patterns of both locations are comparable, mean temperature is approximately  
409 4 °C lower in Sörenberg than in Zürich (Supplementary Figure 1). Alternatively, differences  
410 between the two Swiss sites might relate to *S. neocynipsea* being rare around Zürich, in fact in  
411 European lowlands in general (Pont & Meier, 2002), while this species is common at higher  
412 alpine altitudes. If based primarily on behavioral mate choice, reinforcement is expected to be  
413 stronger, and hence its evolution more likely, wherever interspecific encounter frequencies  
414 are higher. Moreover, given that the evidence for the Zürich site is based on both wild-caught  
415 and laboratory specimens, the weaker patterns of reinforcement observed in Zürich might be  
416 partially explained by purifying selection in the laboratory against introgressed variants.  
417 Nevertheless, the results from our analyses performed with both wild-caught and laboratory *S.*  
418 *cynipsea* samples from Zürich yielded consistent results (Supplementary Table 2), suggesting  
419 that whether flies came from a natural or laboratory population did not affect the outcome.  
420 Overall, we therefore do not think that purifying selection in the laboratory confounded our  
421 results.

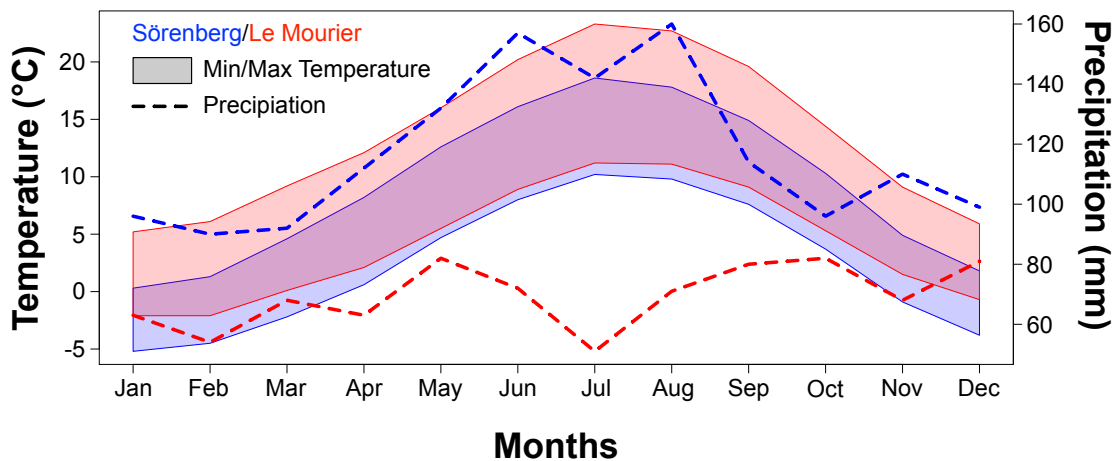

422

423 **Fig. 3. Climatic differences between the Sörenberg (Swiss Alps; blue) and Le Mourier**  
424 **(French Cevennes; red);** polygons and dashed lines show monthly average temperature  
425 ranges and precipitation at the two sampling sites, respectively. The data from the WorldClim  
426 dataset (Hijmans *et al.* 2011) represent 50-year averages of observations in quadratic grid  
427 cells with an edge of length 2.5' (~ 5 km<sup>2</sup> in size) around the coordinates of the two sites  
428 (Table 1). The two locations are characterized by strong differences in precipitation, especially  
429 during the main reproductive season of sepsid flies from May to October.

430 Laboratory hybridization experiments have shown that interspecific mating between *S.*  
431 *cynipsea* and *S. neocynipsea* can result in viable and fertile F<sub>1</sub> hybrid females and offspring in  
432 backcrosses with the parental species (Giesen *et al.*, 2017, 2019). Together with  
433 morphological and behavioral similarities among the two species, these laboratory  
434 experiments suggest that hybridization may well take place in areas of co-occurrence, such as  
435 the French Cevennes. In other areas, including our sampling site in the Swiss Alps, subtle  
436 premating behavioral barriers and the reductions in fecundity and fertility also previously  
437 documented in the laboratory by Giesen *et al.* (2017, 2019) may combine with micro-  
438 ecological niche differences to mediate spatio-temporally divergent reproductive timing. Such  
439 a divergence may effectively prevent hybridization in nature and ultimately reinforce species  
440 boundaries. This interpretation is strengthened by a study on Central American *Archiseptis*  
441 *diversiformis* flies showing that mating between two disjunct populations is only evident  
442 under forced laboratory conditions, while under conditions of free mate choice flies from the

443 different populations do not interbreed (Puniamorthy 2014). Behavioral mating barriers  
444 therefore seem to evolve comparatively fast (Gleason & Ritchie, 1998; Puniamorthy *et al.*,  
445 2009; Puniamorthy, 2014), especially if species occur in sympatry and reinforcement by  
446 natural or sexual selection can operate (Coyne & Orr, 2004; Seehausen, 2004; Ritchie, 2007).

447 Our study of introgression patterns among sympatric *S. cynipsea* and *S. neocynipsea*  
448 populations relied on the ABBA-BABA test, which was initially designed for the analysis of  
449 haploid genotypes of one individual from each of four lineages (Green *et al.*, 2010). Recent  
450 extensions of this original approach to allele frequency data by Durand *et al.* (2011) and  
451 Soraggi *et al.* (2018), which incidentally were here shown to not be equally sensitive in  
452 picking up introgression patterns, enabled us to apply the method equivalently to pool-  
453 sequenced laboratory as well as to field-caught specimens (see also Deitz *et al.* 2016). As a  
454 technical innovation, we have here provided a Python implementation of the ABBA-BABA  
455 approaches by Durand *et al.* (2011) and Soraggi *et al.* (2018) that takes a simple 2D matrix of  
456 allele frequencies as input. This implementation allows restricting the ABBA-BABA test to  
457 high-confidence SNPs that pass a set of user-defined filters. Such filtering can reduce  
458 artefacts of pool-sequencing (Schlötterer *et al.* 2014) that may produce false polymorphisms  
459 due to sequencing errors (Futschik & Schlötterer 2011; Cutler & Jensen 2012). In addition,  
460 and in contrast to the software package ANGSD (Korneliussen *et al.* 2014), our  
461 implementation accommodates an outgroup (P4) taxon different from the one used as a  
462 reference to call the SNPs. This feature reduces a potential reference bias if the ingroup taxa  
463 (P1, P2, P3) strongly differ from an outgroup that also serves as reference (Ballouz *et al.*  
464 2019). Our script and detailed instructions for how to use it are available on GitHub  
465 (<https://github.com/capoony/ABBA-BABA-4-AF>; see also Supporting Information).

466 In summary, we found evidence that the extent of interspecific gene flow between two  
467 closely related sepsid fly species in sympatry relative to allopatry varies with the geographic  
468 location of the site. Interspecific gene flow in sympatry appears to be reduced at two Swiss  
469 sites, where the two species have likely locally adapted to different (micro-)ecological niches,  
470 such as different breeding times or phenologies, and/or where pre- or postmating reproductive  
471 barriers (Giesen *et al.*, 2017) have been and are subject to stronger reinforcement. Future  
472 studies are needed to determine if ecological and/or sexual selection are indeed driving the  
473 gene flow patterns we identified, and future genomic research should analyze patterns of  
474 genomic differentiation across allopatric populations from Europe as well as North America  
475 (Baur *et al.*, 2020). It remains unclear why *S. neocynipsea* is rare in Europe, but common in  
476 North America, and why *S. cynipsea* abounds around fresh dung all over Europe north of the  
477 Alps and apparently outcompetes and ultimately relegates *S. neocynipsea* towards presumably  
478 marginal, high altitude habitats (Pont & Meier, 2002). Such analyses would provide further  
479 insights into introgression patterns across the species' entire natural range, as well as into the  
480 role of local (e.g., longitudinal or latitudinal) adaptation in shaping genome-wide patterns of  
481 differentiation.

## 482 ACKNOWLEDGEMENTS

483 Genome resequencing was performed at the Functional Genomics Center Zürich (FGCZ),  
484 and we particularly thank FGCZ staff member Jelena Kühn-Georgijevic for her support. We  
485 thank the Wolfpack at the University of Zürich for their support and help in maintaining fly  
486 cultures, and Patrick Rohner, Juan Pablo Busso, Nalini Puniamoorthy, Anders Kjaersgaard,  
487 Toomas Esperk and Cait Dmitriew for contributing samples. B.M., O.N. and L.P. thank the  
488 Leibniz association for granting funds to establish the Leibniz graduate school for Genomic  
489 Biodiversity Research (GBR), in which context the reference draft genomes of several *Sepsis*



490 species explored in this study were sequenced and assembled. We particularly thank the GBR  
491 members Jeanne Wilbrandt, Jan Philip Øyen, and Malte Petersen for their contribution to the  
492 assembly pipeline. The University Research Priority Program ‘Evolution in Action’ of the  
493 University of Zürich, the Swiss National Science Foundation, and the Georges and Antoine  
494 Claraz-Donation funded the work of A.G., the Austrian Science Foundation (grant no. FWF  
495 P32275) the work of M.K.

#### 496 **DATA ACCESSIBILITY**

497 All sequencing data have been deposited at the short-read archive (SRA;  
498 <https://www.ncbi.nlm.nih.gov/sra>) under the accession number PRJNA612154. Novel  
499 software is available at GitHub (<https://github.com/capoony/ABBA-BABA-4-AF>).

#### 500 **AUTHORS CONTRIBUTION**

501 AG, WUB, KKS, HELL, SA and MK conceived and designed the study. MAS and AG  
502 gathered and prepared the samples and generated the genomic data. BM, ON and LP  
503 sequenced and constructed the reference genome. MK, AG, SA and HELL analyzed the  
504 genomic data. MK developed new software. AG, MK, SA and WUB wrote the manuscript,  
505 with ON, KKS, RSI, LP, BM, MAS and HELL contributing to the interpretation of the data,  
506 and editing and commenting on various versions of the manuscript. WUB, KKS, RSI, and  
507 HELL were members of AG’s PhD committee, providing guidance and input at all stages.

#### 508 509 **LITERATURE CITED**

- 510 Aeschbacher, S., Selby, J.P., Willis, J.H. & Coop, G. 2017. Population-genomic inference of the  
511 strength and timing of selection against gene flow. *PNAS* 114: 7061–7066.
- 512 Anderson M.B. (1949). Sexual selection. *Princeton University Press*.
- 513 Andrews, S., Lindenbaum, P., Howard, B., & Ewels, P. (2011). FastQC High throughput  
514 sequence QC report v. 0.10. *Babraham Bioinformatics, Cambridge, UK*.



- 515            Arnold M.L. & Meyer A. (2006). Natural hybridization in primates: one evolutionary  
516 mechanism. *Zoology*, 109(4): 261–276.
- 517            Ballouz, S., Dobin, A. & Gillis, J.A. (2019). Is it time to change the reference genome? *Genome*  
518 *Biology* 20: 159.
- 519            Barton N., & Bengtsson B.O. (1986). The barrier to genetic exchange between hybridising  
520 populations. *Heredity*, 57(3): 357–376.
- 521            Baur J., Schäfer M.A., Blanckenhorn W.U., & Giesen A. (2020). Patterns of genetic  
522 differentiation in sexual and neutral morphological traits among species and populations of dung  
523 flies (Diptera: Sepsidae). *Journal of Zoological Systematics and Evolutionary Research* 58: 159–  
524 173.
- 525            Berner D. & Salzburger W. (2015). The genomics of organismal diversification illuminated by  
526 adaptive radiations. *Trends in Genetics*, 31: 491–499.
- 527            Blanckenhorn W.U. (1999). Different growth responses to temperature and resource limitation  
528 in three fly species with similar life histories. *Evolutionary Ecology*, 13: 395–409.
- 529            Blanckenhorn W.U., Mühlhäuser C., Morf C., *et al.* (2000). Female choice, female reluctance to  
530 mate and sexual selection on body size in the dung fly *Sepsis cynipsea*. *Ethology*, 106: 577–593.
- 531            Bolger A.M., Lohse M., & Usadel B. (2014). Trimmomatic: a flexible trimmer for Illumina  
532 sequence data. *Bioinformatics*: btu170.
- 533            Bouchemousse S., Liautard-Haag C., Bierne N., & Viard F. (2016) Distinguishing  
534 contemporary hybridization from past introgression with postgenomic ancestry-informative SNPs  
535 in strongly differentiated *Ciona* species. *Molecular Ecology*, 25: 5527–5542.
- 536            Brandvain Y., Kenney A.M., Flgel L., Coop G., & Sweigart A.L. (2014). Speciation and  
537 introgression between *Mimulus nasutus* and *M. guttatus*. *Plos Genetics*, 10:  
538 doi:10.1371/journal.pgen.1004410
- 539            Butlin R. K. 1995. Reinforcement: an idea evolving. *Trends in Ecology & Evolution*, 10, 432-  
540 434.
- 541            Coyne J.A., & Orr H.A. (2004). Speciation. *Sinauer Associates*.
- 542            Cutler, D.J. & Jensen, J.D. (2010). To Pool, or Not to Pool? *Genetics* 186: 41–43.
- 543            Deitz, K.C., Athrey, G.A., Jawara, M., Overgaard, H.J., Matias, A. & Slotman, M.A. (2016).  
544 Genome-Wide Divergence in the West-African Malaria Vector *Anopheles melas*. *G3: Genes,*  
545 *Genomes, Genetics* 6: 2867–2879.
- 546            DeMarais B.D., Dowling T.E., Douglas M.E., *et al.* (1992). Origin of Gila seminude (Teleostei:  
547 Cyprinidae) through introgressive hybridization: implications for evolution and conservation.  
548 *Proceedings of the National Academy of Sciences* 89(7): 2747–2751.
- 549            Dobzhansky T. (1951). Genetics and the origin of species (3rd ed.). *Columbia University Press*.
- 550            Doebeli M, & Dieckmann U. (2003) Speciation along thermal gradients. *Nature* 421: 259–264.  
551            Durand E.Y., Patterson N., Reich D., & Slatkin M. (2011). Testing for ancient admixture  
552 between closely related populations. *Molecular Biology and Evolution*, 28(8): 2239–2252.

- 553 Eaton D.A. & Ree R.H. (2013). Inferring phylogeny and introgression using RADseq data: an  
554 example from flowering plants (Pedicularis: Orobanchaceae). *Systematic Biology*, 62(5): 689–706.
- 555 Eberhard W.G. (1999). Mating systems of sepsid flies and sexual behavior away from  
556 oviposition sites by *Sepsis neocynipsea* (Diptera: Sepsidae). *Journal of the Kansas Entomological*  
557 *Society*, 72(1): 129–130.
- 558 Feulner P.G.D & Seehausen O. (2018). Genomic insights into the vulnerability of sympatric  
559 whitefish species flocks. *Molecular Ecology*, 28: 615–629.
- 560 Futschik A. & Schlötterer C. (2010). The next generation of molecular markers from passively  
561 parallel sequencing of pooled DNA samples. *Genetics*, 186(1): 207–218.
- 562 Gante H.F., Matschiner M., Malmstrom M., Jakobsen K.S., Jentoft S., & Salzburger W. (2016).  
563 Genomics of speciation and introgression in Princess cichlid fishes from Lake Tanganyika.  
564 *Molecular Ecology*, 25: 6143–6161.
- 565 Giesen A, Blanckenhorn W.U., & Schäfer M.A. (2017). Behavioural mechanisms of  
566 reproductive isolation between two hybridizing dung fly species. *Animal Behaviour*, 132: 155–166.
- 567 Giesen A., Schäfer M.A., & Blanckenhorn W.U. (2019). Geographic patterns of postzygotic  
568 isolation between two closely related widespread dung fly species (*Sepsis cynipsea* and *Sepsis*  
569 *neocynipsea*; Diptera: Sepsidae). *Journal of Zoological Systematics and Evolutionary Research*,  
570 57: 80–90
- 571 Gleason, J.M. & Ritchie, M.G. 1998. Evolution of courtship song and reproductive isolation in  
572 the *Drosophila willistoni* species complex: Do sexual signals diverge the most quickly? *Evolution*,  
573 52: 1493–1500.
- 574 Green R.E., Krause J., Briggs A.W., *et al.* (2010). A draft sequence of the Neanderthal genome.  
575 *Science*, 328(5979): 710–722.
- 576 Grossenbacher D.L. & Whittall J.B. (2011). Increased floral divergence in sympatric  
577 monkeyflowers. *Evolution*, 65: 2712–2718.
- 578 Haldane J.B.S. (1922). Sex ratio and the unisexual sterility in animal hybrids. *Journal of*  
579 *Genetics* 12: 101–109.
- 580 Heliconius Genome Consortium (2012). Butterfly genome reveals promiscuous exchange of  
581 mimicry adaptations among species. *Nature*, 487(7405): 94–98.
- 582 Hijmans, R.J., Cameron, S.E., Parra, J.L., Jones, P.G. & Jarvis, A. 2005. Very high resolution  
583 interpolated climate surfaces for global land areas. *Int. J. Climatol.* **25**: 1965–1978.
- 584 Hudson R.R. (1983). Testing the Constant-Rate Neutral Allele Model with Protein Sequence  
585 Data. *Evolution* 37: 203–217.
- 586 Jeong C., Nakagome S., Di Rienzo A. (2016). Deep History of East Asian Populations Revealed  
587 Through Genetic Analysis of the Ainu. *Genetics*, 202: 261–272.
- 588 Kapun, M., Barron Aduriz, M.G., Staubach, F., *et al.* (2018). Genomic analysis of  
589 European *Drosophila* populations reveals major longitudinal structure, continent-wide selection,  
590 and unknown DNA viruses. *bioRxiv*, DOI: 10.1101/313759.

- 591 Kastally Ch., Trasoletti M., & Mardulyn P. (2019). Limited gene exchange between two sister  
592 species of leaf beetles within a hybrid zone in the Alps. *Journal of evolutionary Biology*, 32: 1406-  
593 1417.
- 594 Kimura, M. (1969). The Number of Heterozygous Nucleotide Sites Maintained in a Finite  
595 Population Due to Steady Flux of Mutations. *Genetics* 61: 893–903.
- 596 Kofler, R., Pandey, R.V. & Schlötterer, C. (2011). PoPoolation2: identifying differentiation  
597 between populations using sequencing of pooled DNA samples (pool-seq). *Bioinformatics* 27:  
598 3435–3436.
- 599 Koren S., Walenz, B.P., Berlin, K., Miller, J.R., Bergman, N.H. & Phillippy, A.M. (2017).  
600 Canu: scalable and accurate long-read assembly via adaptive *k*-mer weighting and repeat  
601 separation. *Genome Research* 27: 722–736.
- 602 Kulathinal R.J. & Singh R.S. (2000). A biogeographic genetic approach for testing the role of  
603 reinforcement: the case of *Drosophila pseudoobscura* and *D. persimilis*. *Evolution*, 54: 210-217.
- 604 Kraushaar U. & Blanckenhorn W.U. (2002). Population variation in sexual selection and its  
605 effect on size allometry in two dung fly species with contrasting sexual size dimorphism.  
606 *Evolution*, 56(2): 307–321.
- 607 Kraushaar U., Goudet J., & Blanckenhorn W.U. (2002). Geographical and altitudinal population  
608 genetic structure of two dung fly species with contrasting mobility and temperature preference.  
609 *Heredity*, 89: 99-106.
- 610 Korneliussen T.S., Albrechtsen A., & Nielsen R. (2014). ANGSD: analysis of next generation  
611 sequencing data. *BMC bioinformatics*, 15(1): 356.
- 612 Li H., Handsaker B., Wysoker A., *et al.* (2009). The sequence alignment/map format and  
613 SAMtools. *Bioinformatics*, 25(16): 2078–2079.
- 614 Li H. & Durbin R. (2009). Fast and accurate short read alignment with Burrows-Wheeler  
615 transform. *Bioinformatics*, 25(14): 1754–1760.
- 616 Mallet J. (2007). Hybrid speciation. *Nature*, 446: 279–283.
- 617 Martin S.H., Dasmahapatra K.K., Nadeau N.J., *et al.* (2014). Genome-wide evidence for  
618 speciation with gene flow in *Hiliconius* butterflies. *Genome Research*, 23: 1817-1828.
- 619 Massie K.R. & Markow T.A. (2005). Sympatry, allopatry and sexual isolation between  
620 *Drosophila mojavensis* and *D. arizonae*. *Heredity*, 142: 51-55.
- 621 Mayr E. (1942). Systematics and the origin of species from the viewpoint of a zoologist.  
622 *Columbia University Press*.
- 623 Mayr E. (1963). Animal and species evolution. In: Animal species and their evolution, *Harvard*  
624 *University Press*.
- 625 McKenna, A., Hanna, M., Banks, E., Sivachenko, A., Cibulskis, K., Kernytsky, A., *et al.* 2010.  
626 The Genome Analysis Toolkit: A MapReduce framework for analyzing next-generation DNA  
627 sequencing data. *Genome Research* 20: 1297–1303.
- 628 Meier J.I., Marques D.A., Selz O.M., *et al.* (2017). Ancient hybridization fuels rapid cichlid fish  
629 adaptive radiations. *Nature Communications*, 8: 14363.

- 630 Moran, P.A., Hunt J., Mitchell Ch., Ritchie M.G., & Bailey N.W. 2019. Behavioural  
631 mechanisms of sexual isolation involving multiple modalities and their inheritance. *Journal of*  
632 *evolutionary Biology*, 32: 243-258.
- 633 Nadeau N.J., Martin S.H., Kozak K.M., *et al.* (2013). Genome-wide patterns of divergence in  
634 gene flow across a butterfly radiation. *Molecular Ecology*, 22: 814-826.
- 635 Nolte A. W., & Tautz D. (2010). Understanding the onset of hybrid speciation. *Trends in*  
636 *Genetics*, 26(2): 54–58.
- 637 Nakazato T., Warren D.L., & Moyle L.C. (2010). Ecological and geographic modes of species  
638 divergence in wild tomatoes. *American Journal of Botany*, 97: 680-693.
- 639 Nei M. (1987). *Molecular Evolutionary Genetics*. Columbia University Press.
- 640 Noor M.A.F. (1999). Reinforcement and other consequences of sympatry. *Heredity*, 83: 503-  
641 508.
- 642 Nosil P. (2009). Adaptive population divergence in cryptic color-pattern following a reduction  
643 in gene flow. *Evolution*, 63(7): 1902–1912.
- 644 Novikova Y.P. *et al.* (2016). Sequencing of the genus *Arabidopsis* identifies a complex history  
645 of non-bifurcating speciation and abundant trans-specific polymorphism. *Nature Genetics* 48:  
646 1077–1082.
- 647 Ozerov A.L. (2005). World catalogue of the family Sepsidae (insect: Diptera). *Zoologicheskie*  
648 *Issledovania (Zoological Studies)*, 8: 1–74.
- 649 Parker G.A. (1972a). Reproductive behaviour of *Sepsis cynipsea* (L.) (Diptera: Sepsidae) I. a  
650 preliminary analysis of the reproductive strategy and its associated behaviour patterns. *Behaviour*,  
651 41(1): 172–205.
- 652 Parker G.A. (1972b). Reproductive behavior of *Sepsis cynipsea* (L.) (Diptera: Sepsidae) II. the  
653 significance of the precopulatory passive phase and emigration. *Behaviour*, 41(3): 242–250.
- 654 Pont A.C., & Meier R. (2002). *The Sepsidae (Diptera) of Europe*. Leiden, N.E.: *Fauna*  
655 *Entomologica Scandinavia*, 37.
- 656 Puniamoorthy N, Ismail M.R.B., Tan D.S.H., & Meier R. (2009). From kissing to belly  
657 stridulation: Comparative analysis reveals surprising diversity, rapid evolution, and much  
658 homoplasy in the mating behaviour of 27 species of sepsid flies (Diptera: Sepsidae). *Journal of*  
659 *Evolutionary Biology*, 22(11): 2146–2156.
- 660 Puniamoorthy N. (2014). Behavioural barriers to reproduction may evolve faster than sexual  
661 morphology among populations of a dung fly (Sepsidae). *Animal Behaviour*, 98: 139–148.
- 662 Reich, D., N. Patterson, M. Kircher, F. Delfin, M. R. Nandineni *et al.*, 2011 Denisova admixture  
663 and the first modern human dispersals into Southeast Asia and Oceania. *American Journal of*  
664 *Human Genetics*, 89: 516–528.
- 665 Rieseberg L.H., Raymond O., Rosenthal D.M., *et al.* (2003). Major ecological transitions in  
666 wild sunflowers facilitated by hybridization. *Science*, 301(5637): 1211–1216.
- 667 Ritchie M.G. (2007). Sexual selection and speciation. *Annual Review of Ecology, Evolution and*  
668 *Systematics*, 38: 79–102.

- 669 Rohner P.T., Bächli, G., Paltrinieri, L.P., Duelli, P., Obrist, M.K., Jochmann, R., &  
670 Blanckenhorn, W.U. (2015). Distribution, diversity gradients and Rapoport's elevational rule in the  
671 black scavenger flies of the Swiss Alps (Diptera: Sepsidae). *Insect Conservation and Diversity*, 8,  
672 367–376.
- 673 Rohner P.T., Blanckenhorn W.U., & Puniamoorthy N. (2016). Sexual selection on male size  
674 drives the evolution of male-biased sexual size dimorphism via theprolongation of male  
675 development. *Evolution*, 70(6): 1189–1199.
- 676 Dafu R., Kangshan M., Lei Z., *et al.* (2016). Genomic evidence for polyphyletic origins and  
677 interlineage gene flow within complex taxa: a case study of *Picea brachytyla* in the Qinghai-Tibet  
678 Plateau. *Molecular Ecology*, 25: 2373–2386.
- 679 Saetre G.P. (2013). Hybridization is important in evolution, but is speciation? *Journal of*  
680 *Evolutionary Biology*, 26(2): 256–258.
- 681 Schlötterer, C., Tobler, R., Kofler, R. & Nolte, V. (2014). Sequencing pools of individuals —  
682 mining genome-wide polymorphism data without big funding. *Nature Reviews Genetics* 15: 749–  
683 763.
- 684 Seehausen O. (2004). Hybridization and adaptive radiation. *Trends in Ecology and Evolution*,  
685 19(4): 198–207.
- 686 Soraggi, S., Wiuf, C. & Albrechtsen, A. (2018). Powerful Inference with the D-Statistic on  
687 Low-Coverage Whole-Genome Data. *G3: Genes, Genomes, Genetics* 8: 551–566.
- 688 Streicher J.W., Devitt T.J., Goldberg C.S., *et al.* (2014). Diversification and asymmetrical gene  
689 flow across time and space: lineage sorting and hybridization in polytypic barking frogs. *Molecular*  
690 *Ecology*, 23(13): 3273–3291.
- 691 Su, K.F.Y., S. N. Kutty, & R. Meier (2008). Morphology versus molecules: the  
692 phylogenetic relationships of Sepsidae (Diptera: Cyclorrhapha) based on morphology and  
693 DNA sequence data from ten genes. *Cladistics* 24:902-916.
- 694 Su, K.F.Y., Puniamoorthy, J., Özsu, N., A. Srivathsan, & R. Meier (2016). Evolutionary  
695 analysis identifies multiple genome expansions and contractions in Sepsidae (Diptera) and suggests  
696 targets for future genomic research. *Cladistics* 32: 308–316.
- 697 Tajima, F. (1983). Evolutionary Relationship of DNA Sequences in Finite Populations.  
698 *Genetics* 105: 437–460.
- 699 Trier C. N., Hermansen J. S., Sætre G. P., & Bailey R. I. (2014). Evidence for mitonuclear and  
700 sex-linked reproductive barriers between the hybrid Italian sparrow and its parent species. *PLoS*  
701 *Genet*, 10(1): e1004075.
- 702 Via S. & West J. (2008). The genetic mosaic suggests a new role for hitchhiking in ecological  
703 speciation. *Molecular Ecology*, 17(19): 4334–4345.
- 704 Ward P.I. (1983). The effects of size on the mating behaviour of the dung fly *Sepsis cynipsea*.  
705 *Behavioural Ecology and Sociobiology*, 13(1): 75–80.
- 706 Ward P.I., Hemmi J., & Rösli T. (1992). Sexual conflict on the dung fly *Sepsis cynipsea*.  
707 *Functional Ecology*, 6(6): 649–653.

708 Wood H.M., Grahame J.W., Humphray S., *et al.* (2008). Sequence differentiation in regions  
709 identified by a genome scan for local adaptation. *Molecular Ecology*, 17(13): 3123–3135.

710 Wu C.I. (2001). The genic view of the process of speciation. *Journal of Evolutionary Biology*,  
711 14(6): 851–856.
